# Supplementary material for: Integrating epidemiological and transcriptomic data reveals novel lipid metabolic drivers of obstructive sleep apnea
Source: Research Square preprint supplement (doi:10.21203/rs.3.rs-7729119/v1), 2025-11-14
Supplement: Supplementary file 1 [file 37748267518a70e246defcdf.xlsx]

## Sheet: Supplementary Table 1
Supplementary Table 1 Association between serum lipid levels and OSA
Blood lipid level (mmol/L)	Model 1	Model 2	Model 3
TC
Continuous	1.03 (0.99, 1.07) 0.1400	1.02 (0.98, 1.07) 0.2461	1.03 (0.99, 1.08) 0.1348
Categories
Tertile 1	Reference	Reference	Reference
Tertile 2	0.98 (0.88, 1.09) 0.7365	0.96 (0.86, 1.07) 0.4518	0.97 (0.87, 1.09) 0.6055
Tertile 3	1.12 (1.01, 1.25) 0.0378	1.09 (0.97, 1.21) 0.1406	1.11 (0.99, 1.24) 0.0837
p for trend	0.0304	0.1153	0.0643
TG
Continuous	1.32 (1.25, 1.41) <0.0001	1.27 (1.19, 1.35) <0.0001	1.08 (1.01, 1.15) 0.0287
Categories
Tertile 1	Reference	Reference	Reference
Tertile 2	1.44 (1.29, 1.60) <0.0001	1.33 (1.19, 1.49) <0.0001	1.12 (1.00, 1.26) 0.0485
Tertile 3	1.75 (1.57, 1.95) <0.0001	1.61 (1.44, 1.80) <0.0001	1.18 (1.05, 1.34) 0.0060
p for trend	<0.0001	<0.0001	0.0097
LDL-C
Continuous	1.10 (1.05, 1.15) <0.0001	1.08 (1.03, 1.13) 0.0024	1.07 (1.01, 1.12) 0.0114
Categories
Tertile 1	Reference	Reference	Reference
Tertile 2	1.09 (0.98, 1.21) 0.1212	1.05 (0.94, 1.17) 0.3718	1.03 (0.92, 1.16) 0.5934
Tertile 3	1.28 (1.15, 1.42) <0.0001	1.20 (1.08, 1.34) 0.0011	1.17 (1.04, 1.31) 0.0074
p for trend	<0.0001	0.001	0.0063
HDL-C
Continuous	0.50 (0.45, 0.55) <0.0001	0.54 (0.48, 0.61) <0.0001	0.78 (0.69, 0.88) <0.0001
Categories
Tertile 1	Reference	Reference	Reference
Tertile 2	0.74 (0.66, 0.83) <0.0001	0.79 (0.70, 0.88) <0.0001	0.93 (0.83, 1.05) 0.2321
Tertile 3	0.49 (0.44, 0.54) <0.0001	0.54 (0.48, 0.61) <0.0001	0.77 (0.68, 0.88) <0.0001
p for trend	<0.0001	<0.0001	<0.0001

## Sheet: Supplementary Table 2
Supplementary Table 2 Gene Ontology and pathway enrichment analysis of DELMRGs in OSA
Category	Term	Description	Count in gene set	%	FDR
BP	GO:0034374	low-density lipoprotein particle remodeling	5	14.7059	9.20143e-06
BP	GO:0002933	lipid hydroxylation	4	11.7647	3.10535e-05
BP	GO:0001676	long-chain fatty acid metabolic process	5	14.7059	3.10535e-05
BP	GO:0006631	fatty acid metabolic process	6	17.6471	0.000122487
BP	GO:0042632	cholesterol homeostasis	6	17.6471	0.000122487
BP	GO:0042759	long-chain fatty acid biosynthetic process	4	11.7647	0.000430927
BP	GO:0042572	retinol metabolic process	4	11.7647	0.00663102
BP	GO:0042359	vitamin D metabolic process	3	8.82353	0.00695521
BP	GO:0008206	bile acid metabolic process	3	8.82353	0.0208426
BP	GO:0019373	epoxygenase P450 pathway	3	8.82353	0.0216936
BP	GO:0034375	high-density lipoprotein particle remodeling	3	8.82353	0.0216936
BP	GO:0019433	triglyceride catabolic process	3	8.82353	0.0216936
BP	GO:0010744	positive regulation of macrophage derived foam cell differentiation	3	8.82353	0.0216936
BP	GO:0015908	fatty acid transport	3	8.82353	0.0427972
CC	GO:0005789	endoplasmic reticulum membrane	11	32.3529	0.000708834
CC	GO:0016592	mediator complex	4	11.7647	0.00126146
CC	GO:0070847	core mediator complex	3	8.82353	0.0188581
MF	GO:0020037	heme binding	6	17.6471	0.000964262
MF	GO:0016491	oxidoreductase activity	6	17.6471	0.00313502
MF	GO:0005506	iron ion binding	5	14.7059	0.00529285
MF	GO:0004497	monooxygenase activity	4	11.7647	0.010036
MF	GO:0005324	long-chain fatty acid transmembrane transporter activity	3	8.82353	0.010036
MF	GO:0004806	triacylglycerol lipase activity	3	8.82353	0.0131853
MF	GO:0005543	phospholipid binding	4	11.7647	0.030125
MF	GO:0016712	oxidoreductase activity, acting on paired donors, with incorporation or reduction of molecular oxygen, reduced flavin or flavoprotein as one donor, and incorporation of one atom of oxygen	3	8.82353	0.0319024
MF	GO:0019825	oxygen binding	3	8.82353	0.0319024
MF	GO:0047747	cholate-CoA ligase activity	2	5.88235	0.0364538
MF	GO:0062181	1-alpha,25-dihydroxyvitamin D3 23-hydroxylase activity	2	5.88235	0.0364538
MF	GO:0102965	alcohol-forming long-chain fatty acyl-CoA reductase activity	2	5.88235	0.0364538
MF	GO:0080019	alcohol-forming very long-chain fatty acyl-CoA reductase activity	2	5.88235	0.0364538
MF	GO:0070576	vitamin D 24-hydroxylase activity	2	5.88235	0.0364538
MF	GO:0019899	enzyme binding	5	14.7059	0.0368434
MF	GO:0008391	arachidonate monooxygenase activity	2	5.88235	0.0478058
KEGG	hsa03320	PPAR signaling pathway	6	17.6471	0.000513365
KEGG	hsa04975	Fat digestion and absorption	5	14.7059	0.000654924
KEGG	hsa00565	Ether lipid metabolism	4	11.7647	0.0195365
KEGG	hsa01100	Metabolic pathways	14	41.1765	0.0195365
KEGG	hsa00561	Glycerolipid metabolism	4	11.7647	0.0301486
KEGG	hsa05204	Chemical carcinogenesis - DNA adducts	4	11.7647	0.0324448

## Sheet: Supplementary Table 3
Supplementary Table 3 ROC analysis for ten DELMRGs
Gene	GSE135917 dataset					GSE38792 dataset
	AUC	sensitivity	specificity	Youden	p	AUC	sensitivity	specificity	Youden	p
CYP1A1	0.897	1	0.676	0.676	0.001	0.738	0.625	0.9	0.525	0.0913739
CYP2E1	0.912	1	0.706	0.706	<0.001	0.575	1	0.25	0.25	0.593955
CYP3A4	0.838	0.75	0.853	0.603	0.003	0.8	0.75	0.8	0.55	0.0329694
CYP4A22	0.945	0.875	0.971	0.846	<0.001	0.838	0.875	0.8	0.675	0.0164393
FAR1	0.949	0.882	1	0.882	<0.001	0.725	0.4	1	0.4	0.109745
MED18	0.923	0.875	0.912	0.787	<0.001	0.8	1	0.6	0.6	0.0329694
PLA2G10	0.82	0.875	0.824	0.699	0.005	0.588	0.4	0.875	0.275	0.533964
PTGS2	0.857	1	0.706	0.706	0.002	0.538	0.5	0.75	0.25	0.78981
SLC27A5	0.941	1	0.765	0.765	<0.001	0.625	0.75	0.6	0.35	0.374259
UGT8	0.982	1	0.941	0.941	<0.001	0.538	0.375	0.9	0.275	0.78981
